# Supplementary material for: Global accumulation of circRNAs during aging in Caenorhabditis elegans
Source: PubMed Central journal article supplement (PMC5753478; doi:10.1186/s12864-017-4386-y), 2018-01-03
Supplement: 12864_2017_4386_MOESM1_ESM.pdf [file 12864_2017_4386_MOESM1_ESM.pdf]

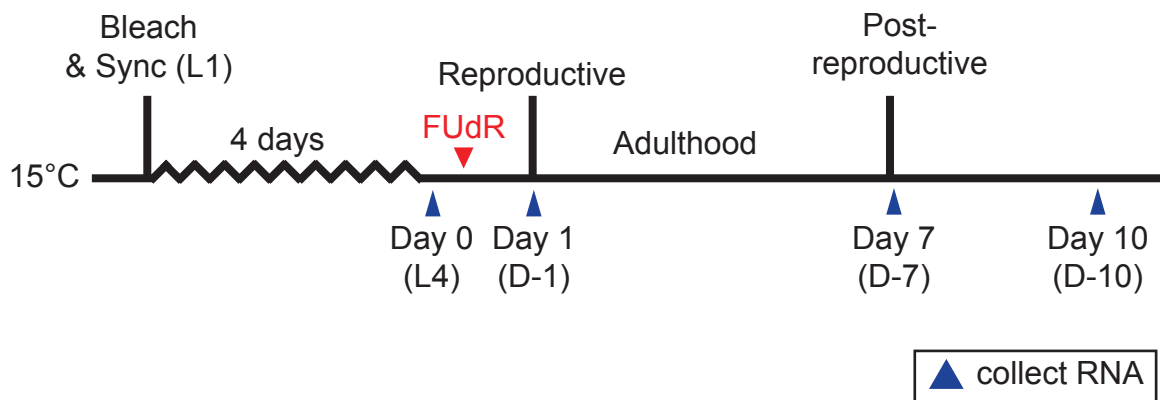

**FIG. S1**
